# Supplementary material for: Identification of vaccine-derived rotavirus strains in children with acute gastroenteritis in Japan, 2012-2015
Source: PubMed Central journal article supplement (PMC5597190; doi:10.1371/journal.pone.0184067), 2017-09-13
Supplement: pone.0184067.s001.pdf [file pone.0184067.s001.pdf]

**S1 Table. Primers and probes used in real-time RT-PCR assays.**

| Assay                           | Primer/<br>Probe | Polarity <sup>a</sup> | Sequence (5'-3') <sup>b</sup>               | Nucleotide<br>Position <sup>c</sup> (nt) | Amplicon<br>Size (bp) | Reference |
|---------------------------------|------------------|-----------------------|---------------------------------------------|------------------------------------------|-----------------------|-----------|
| <b>Rotarix</b><br><b>NSP2</b>   | NSP2-F           | +                     | GAACTTCCTTGAATATAAGATCACACTGA               | 592-620                                  |                       |           |
|                                 | NSP2-R           | -                     | TTGAAGACGTAAATGCATACCAATTC                  | 872-847                                  | 281                   | [1]       |
|                                 | NSP2-P           | -                     | FAM-TCCAATAGATTGAAGT{C}AGTAA“C”GTTTCCA-BHQ1 | 828-799                                  |                       |           |
| <b>RotaTeq</b><br><b>VP6</b>    | VP6-F            | +                     | GCGGCGTTATTTCCAAATGCACAG                    | 936-959                                  |                       |           |
|                                 | VP6-R            | -                     | CGTCGGCAAGCACTGATTCACAAA                    | 1035-1012                                | 100                   | [1]       |
|                                 | VP6-P            | +                     | FAM-ATCACGCAA“C”AGTAGGACT“C”ACGCTT-BHQ1     | 970-995                                  |                       |           |
| <b>Rotavirus</b><br><b>NSP3</b> | JVKF             | +                     | CAGTGGTTGATGCTCAAGATGGA                     | 17-39                                    |                       |           |
|                                 | JVKR             | -                     | TCATTGTAATCATATTGAATACCCA                   | 147-123                                  | 131                   | [2]       |
|                                 | JVKP             | -                     | FAM-ACAACCTGCAGCTTCAAAAGAAGWGT-BHQ          | 96-72                                    |                       |           |

<sup>a</sup> +, Forward; -, Reverse.

<sup>b</sup> {C}, AP-dC (G-clamp); “C”, C-5 propynyl-dC (pDC)

<sup>c</sup> The positions correspond to NSP2 (FJ423152), VP6 (FJ423150) and NSP3 (FJ423152) of reference Wa strain.

1. Gautam R, Esona MD, Mijatovic-Rustempasic S, Ian Tam K, Gentsch JR, Bowen MD. Real-time RT-PCR assays to differentiate wild-type group A rotavirus strains from Rotarix(®) and RotaTeq(®) vaccine strains in stool samples. *Hum Vaccin Immunother.* 2014;10(3):767–77.
2. Jothikumar N, Kang G, Hill VR. Broadly reactive TaqMan assay for real-time RT-PCR detection of rotavirus in clinical and environmental samples. *J Virol Methods.* 2009;155(2):126–31.
