# Supplementary material for: Identification of vaccine-derived rotavirus strains in children with acute gastroenteritis in Japan, 2012-2015
Source: PubMed Central journal article supplement (PMC5597190; doi:10.1371/journal.pone.0184067), 2017-09-13
Supplement: pone.0184067.s003.pdf [file pone.0184067.s003.pdf]

**S3 Table. GenBank accession numbers for representative gene sequences of seven positive samples in Rotarix NSP2 assay.**

削除: none

| Sample No.     | GenBank accession numbers |          |          |          |          |          |          |          |          |          |          |
|----------------|---------------------------|----------|----------|----------|----------|----------|----------|----------|----------|----------|----------|
|                | VP1                       | VP2      | VP3      | VP4      | NSP1     | VP6      | NSP3     | NSP2     | VP7      | NSP4     | NSP5     |
| 1 <sup>a</sup> | KY616885                  | KY616886 | KY616887 | KY616888 | KY616889 | KY616890 | KY616891 | KY616892 | KY616893 | KY616894 | KY616895 |
| 2              | —                         | —        | —        | —        | —        | —        | —        | —        | —        | —        | —        |
| 3              | —                         | —        | —        | —        | —        | —        | —        | —        | —        | —        | —        |
| 4              | —                         | —        | —        | KY616896 | —        | KY616897 | —        | KY616898 | KY616899 | —        | —        |
| 5              | —                         | —        | —        | —        | —        | —        | —        | —        | —        | —        | —        |
| 6              | —                         | —        | —        | KY616900 | —        | KY616901 | —        | KY616902 | KY616903 | —        | —        |
| 7              | —                         | —        | —        | KY616904 | —        | KY616905 | —        | KY616906 | KY616907 | —        | —        |

<sup>a</sup> Only genome sequences of RVA wild-type strains were deposited.
