# Supplementary material for: Identification of vaccine-derived rotavirus strains in children with acute gastroenteritis in Japan, 2012-2015
Source: PubMed Central journal article supplement (PMC5597190; doi:10.1371/journal.pone.0184067), 2017-09-13
Supplement: pone.0184067.s004.pdf [file pone.0184067.s004.pdf]

## 1 **S1 Text. Supplementary Material for PAGE**

2 RNA PAGE has been widely utilized to characterize new rotavirus strains  
3 found in epidemiological studies as the dsRNA migration pattern can be directly  
4 visualized with relatively simple equipment [1]. According to previous studies, for  
5 samples of concurrent infection with several rotavirus strains, they presented with more  
6 than 11 RVA segments on PAGE [2]. For samples possessing viruses with  
7 rearrangement, typical RNA segments are missing or are decreased in concentration and  
8 replaced by additional, more slowly migrating bands of RNA [3,4]. Since Rotarix  
9 original strain had a long electropherotype pattern which was similar but not identical  
10 with that of Wa-like strain [5], we hypothesized that the pattern of wild-type strains and  
11 Rotarix strain could be distinguished to show either reassortment or concurrent infection  
12 happened in sample No.1 and No.6. As a result, those samples that had low viral titers  
13 approximately under  $12.0 \log_{10}$  copies/g of stool were unlikely to show any  
14 electropherotype patterns. In sample No.1, only wild-type strain, which had viral titer of  
15  $13.08 \log_{10}$  copies/g of stool, showed a short electropherotype pattern of DS-1-like  
16 strain. Sample No.6, which had low viral titer of both wild-type strain and  
17 Rotarix-derived strain, yielded no expected pattern. In summary, it was impossible to  
18 apply the results of PAGE to interpret the existence of two strains in both samples.

- 19 1. Herring AJ, Inglis NF, Ojeh CK, Snodgrass DR, Menzies JD. Rapid  
20 diagnosis of rotavirus infection by direct detection of viral nucleic acid in  
21 silver-stained polyacrylamide gels. *J Clin Microbiol.* 1982;16(3):473-7.
- 22 2. Nyaga MM, Jere KC, Esona MD, Seheri ML, Stucker KM, Halpin RA, et al.  
23 Whole genome detection of rotavirus mixed infections in human, porcine and  
24 bovine samples co-infected with various rotavirus strains collected from  
25 sub-Saharan Africa. *Infect Genet Evol.* 2015;31:321–34.
- 26 3. Estes MK, Greenberg HB. Rotaviruses. In: Kinpe DM, Howley PM, editors.  
27 *Fields virology sixth edition.* Philadelphia: Lippincott; 2013.1347–401.
- 28 4. Schnepf N, Deback C, Dehee A, Gault E, Perez N, Garbarg-Chenon A.  
29 Rearrangements of rotavirus genomic segment 11 are generated during acute  
30 infection of immunocompetent children and do not occur at random. *J Virol.*  
31 2008;82(7):3689–96.
- 32 5. Nakagomi T, Nakagomi O, Dove W, Doan YH, Witte D, Ngwira B, et al.  
33 Molecular characterization of rotavirus strains detected during a clinical trial of a  
34 human rotavirus vaccine in Blantyre, Malawi. *Vaccine.* 2012;30 Suppl  
35 1(01):A140-51.

36
